# Supplementary material for: A combination of differential expression and network connectivity analyses identifies a common set of RNA splicing and processing genes altered with age across human tissues
Source: publisher site journal article supplement (doi:10.18632/aging.206347), 2025-12-22
Supplement: Supplementary file 2 [file aging-v17i12-206347-supplementary-material-SD1.pdf]

**SUPPLEMENTARY FIGURES**

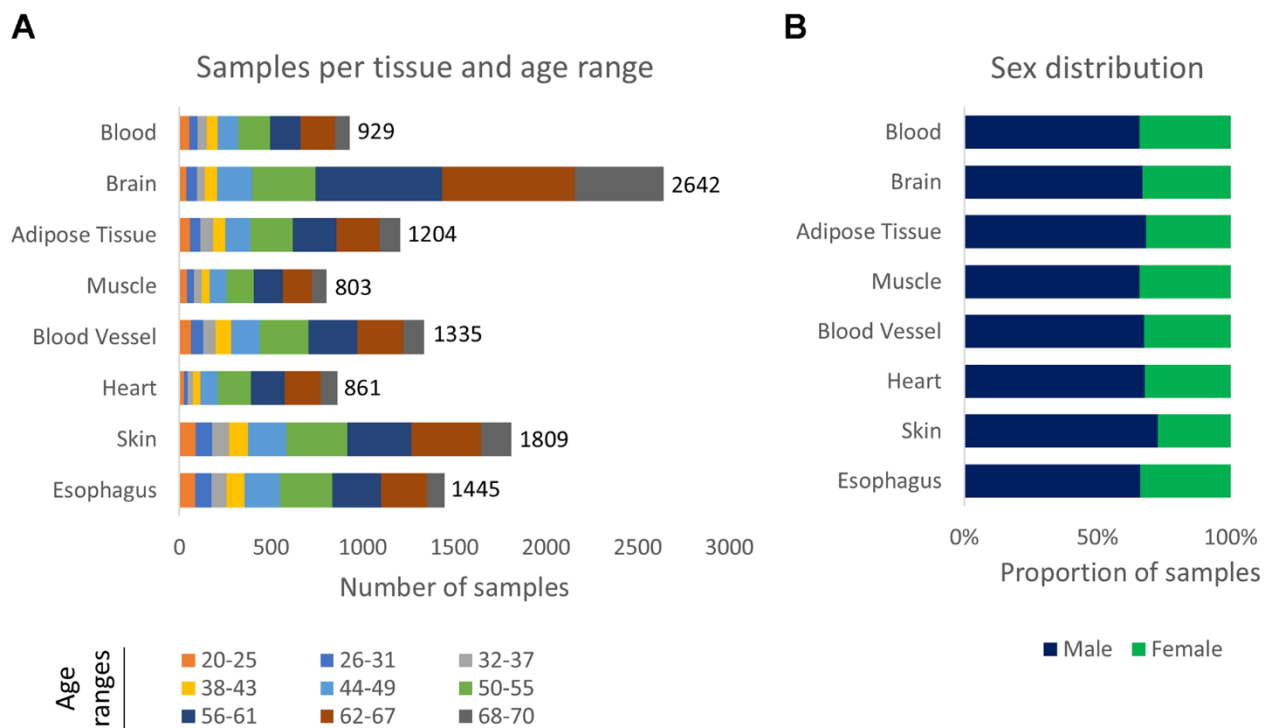

**Supplementary Figure 1. Dataset description.** (A) Number of samples per tissue per age range; age ranges (shown below) account for 6 years each, except for the last one, which accounts for 3 years. (B) Proportion of male and female samples in each tissue.

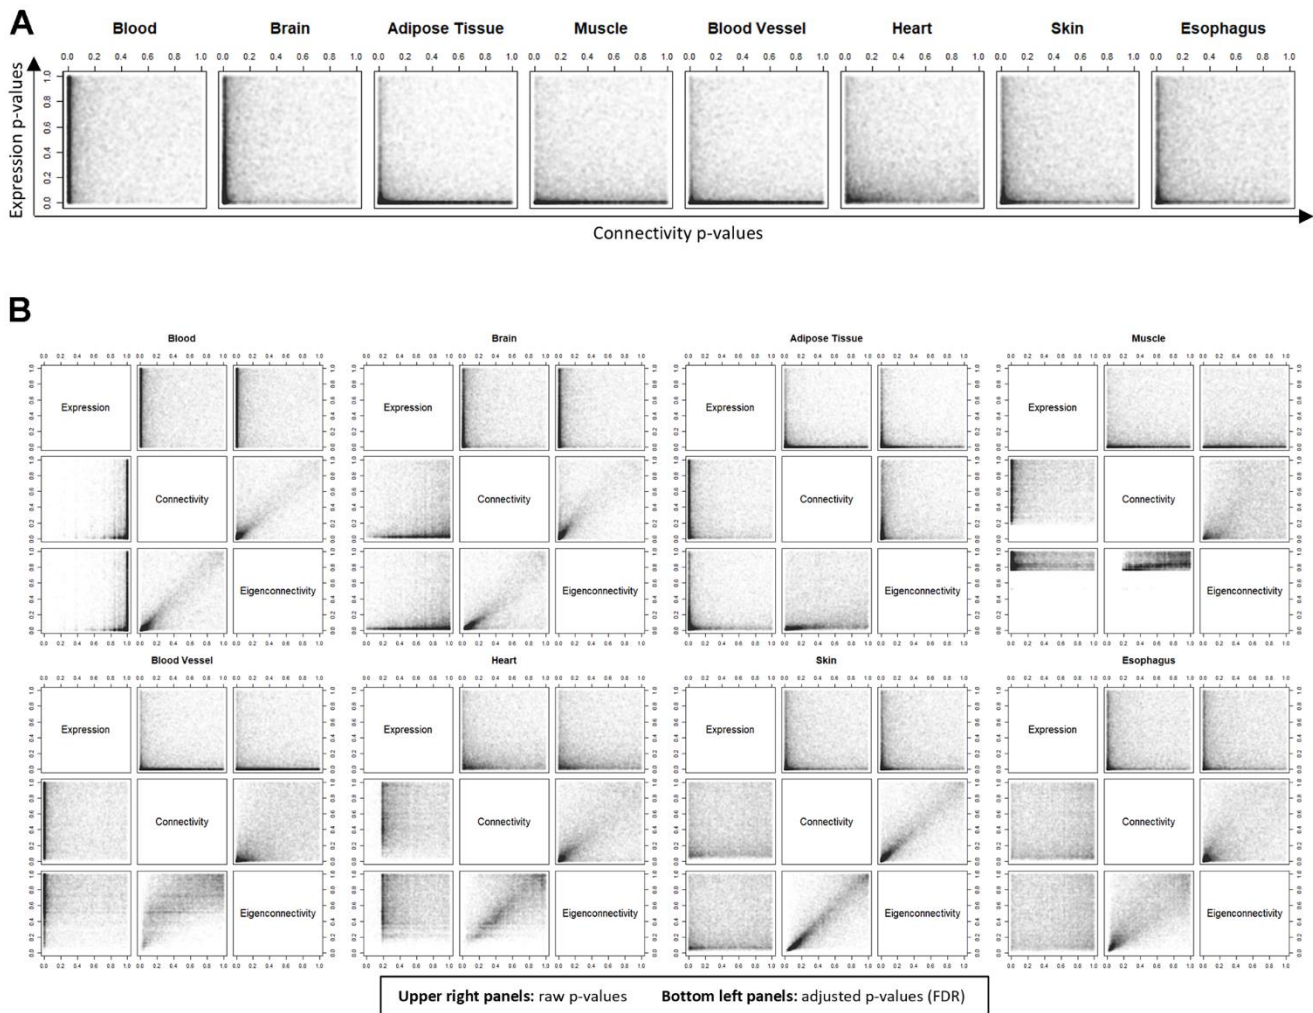

**Supplementary Figure 2. Altered genes per tissue.** (A) Distribution of raw p-values in each tissue only for differential expression and differential connectivity. (B) Distribution of raw p-values (upper right panels) and FDR adjusted p-values (bottom left panels) in each tissue for the three regressions.

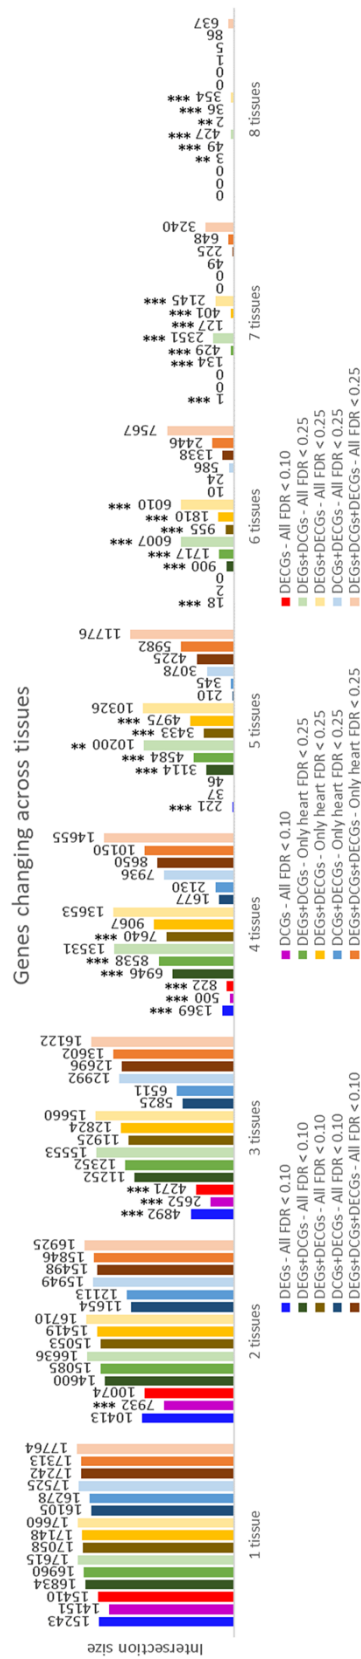

**Supplementary Figure 3. Intersect counts.** Number of DEGs, DCGs, DECGs, and combinations of these metrics detected in sets of 1 up to 8 tissues. The charts display the number of genes in the set and their significance in a permutation test. Significance levels: FDR<0.1 (\*), FDR<0.01 (\*\*), FDR<0.001 (\*\*\*).

**A****Differential expression analysis p-values and adjusted p-values (FDRs) density histogram**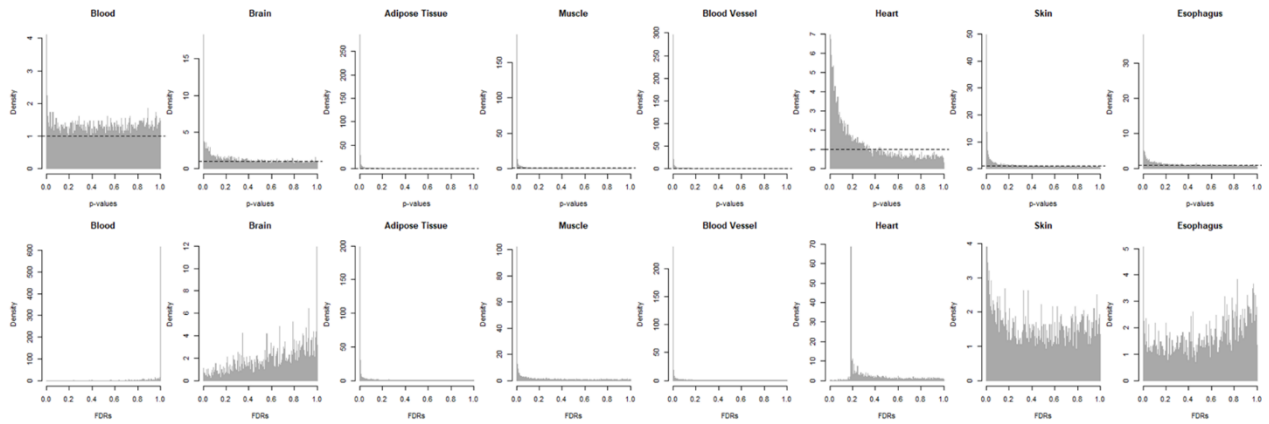**B****Differential connectivity analysis p-values and adjusted p-values (FDRs) density histogram**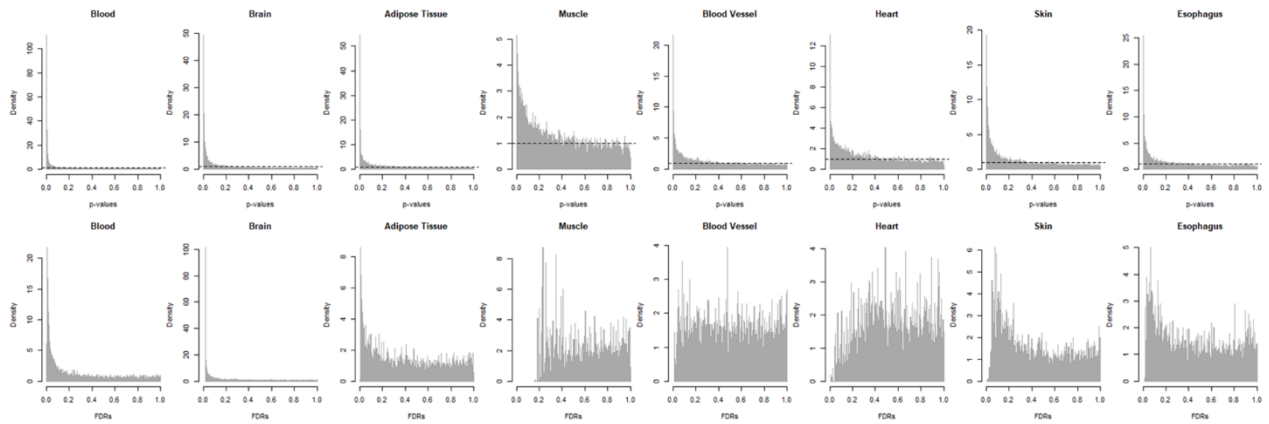**C****Differential eigenconnectivity analysis p-values and adjusted p-values (FDRs) density histogram**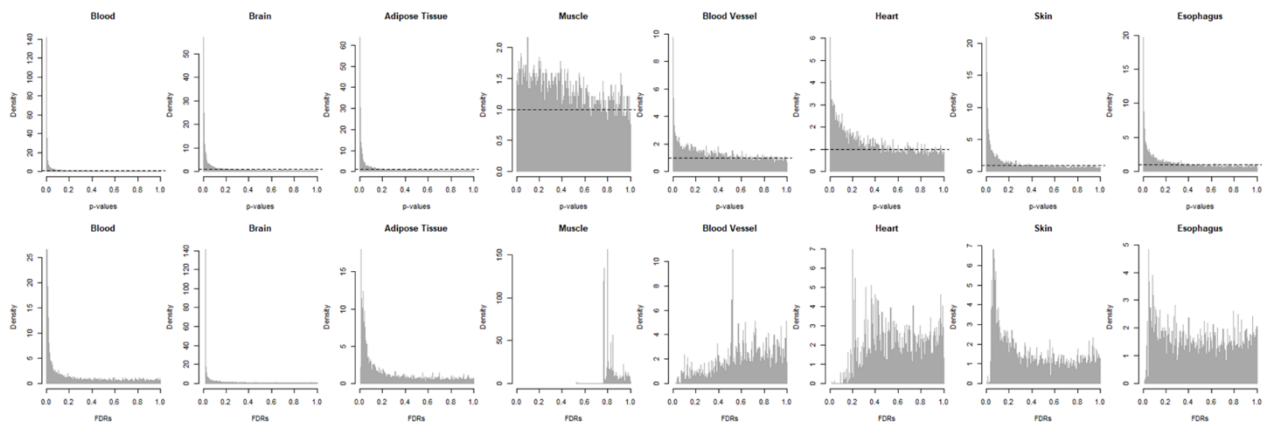

**Supplementary Figure 4. Density histogram of p-values and adjusted p-values (FDRs) of the regression analyses in each tissue. (A) Distribution of p-values and adjusted p-values (FDRs) in the differential expression analysis. (B) Distribution of p-values and adjusted p-values (FDRs) in the differential connectivity analysis. (C) Distribution of p-values and adjusted p-values (FDRs) in the differential eigenconnectivity analysis. Dashed horizontal lines in the raw p-value density histograms represent what would be the expected distribution of p-values if the null hypothesis of no change was true for all genes.**

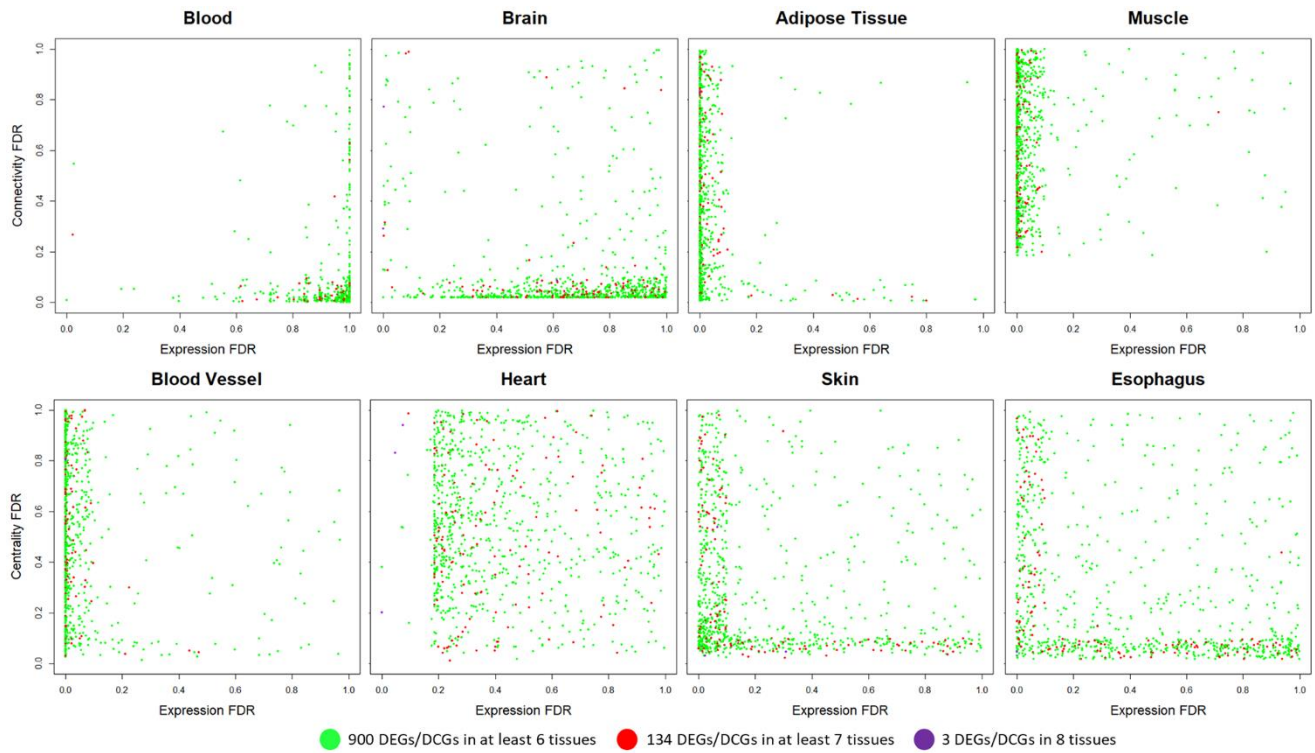

**Supplementary Figure 5. Scatterplots with FDR distributions in both regressions with intersecting genes highlighted.** Green points represent the 900 DEGs/DCGs in at least 6 tissues, red points represent the 134 DEGs/DCGs in at least 7 tissues, and purple points represent the 3 DEGs/DCGs in 8 tissues.

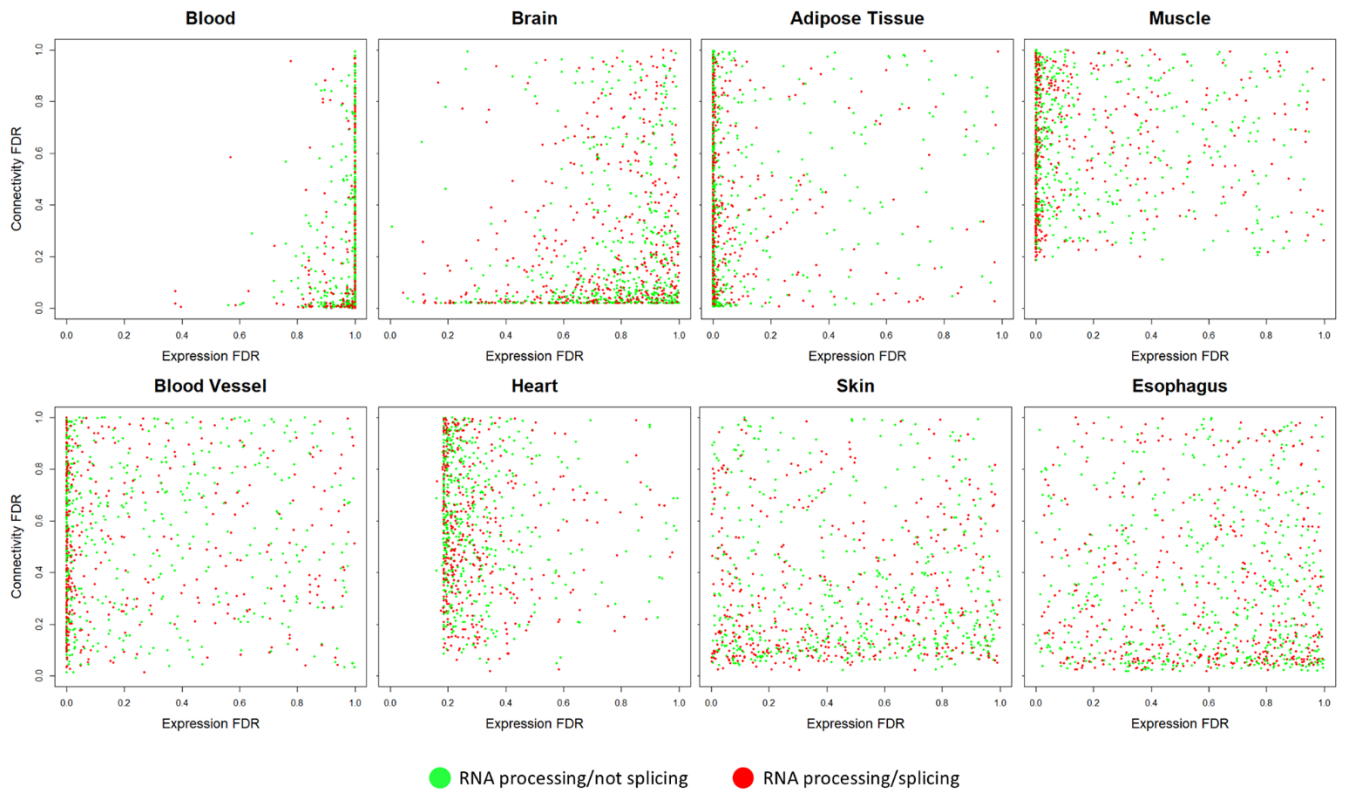

**Supplementary Figure 6. Distribution of genes annotated as “RNA processing” or “RNA splicing” in the FDR distribution charts.**

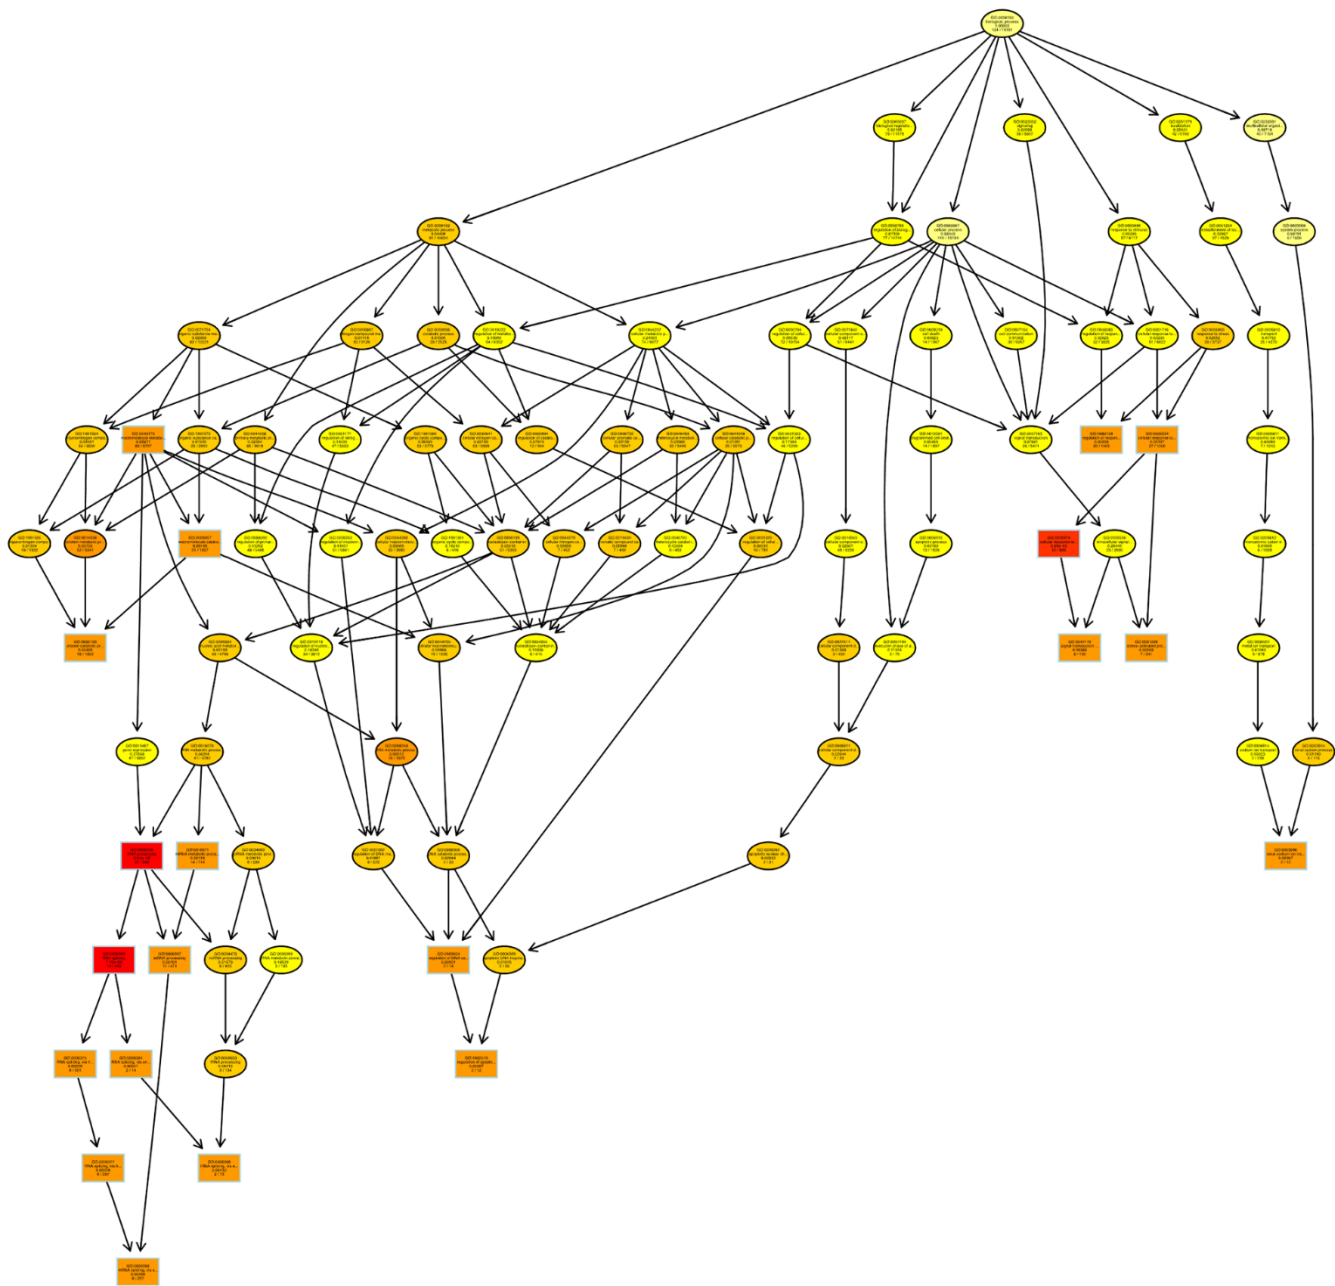

Supplementary Figure 7. Induced GO subgraph of the 20 top enriched nodes in the 134 set.

### DEGs and DCGs slopes in the intersection sets

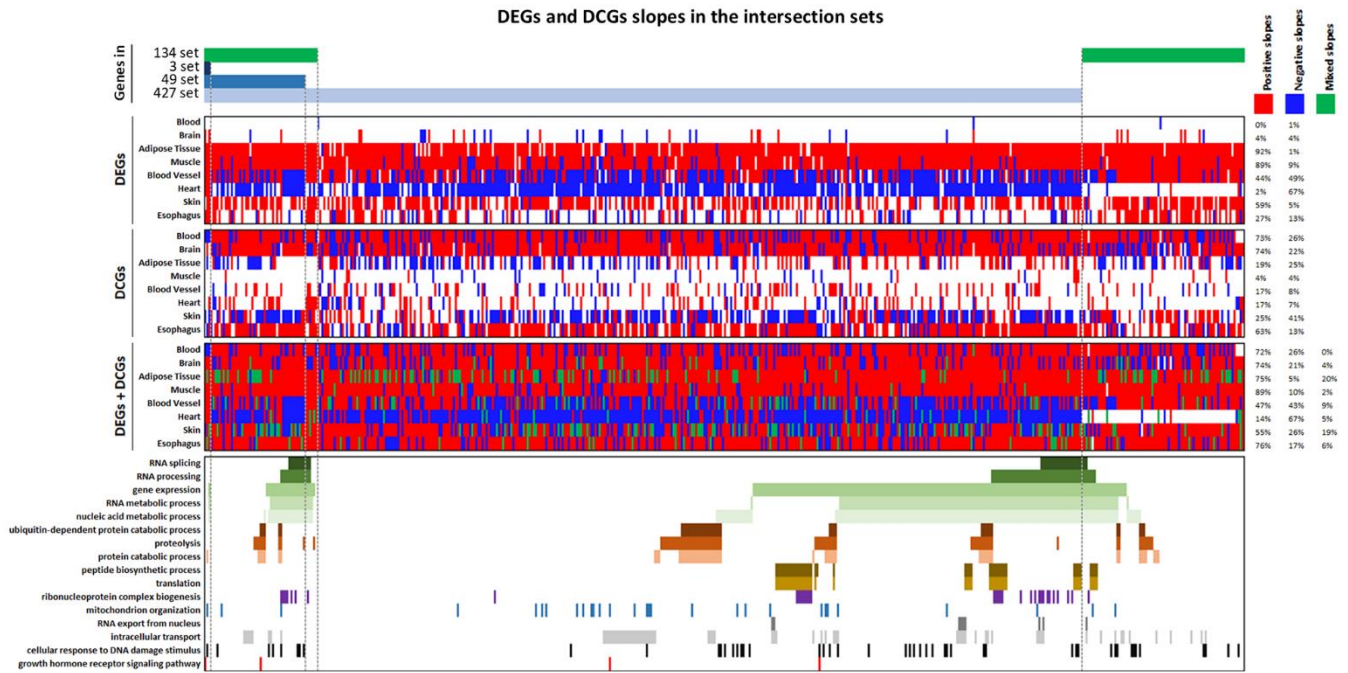

**Supplementary Figure 8. Slopes of DEGs and DCGs in the selected intersection sets.** In the two upper heatmaps, red entries represent positive and blue entries represent negative slopes. In the bottom heatmap, red entries represent genes that are either a positive DEG, a positive DCG, or positive in both regressions; blue entries represent genes that are either a negative DEG, a negative DCG, or negative in both regressions; and green entries indicate genes significant in both regressions, but the slopes have opposite signals (either a positive DEG and negative DCG or a negative DEG and positive DCG). The most annotated terms were selected and displayed in the last panel.

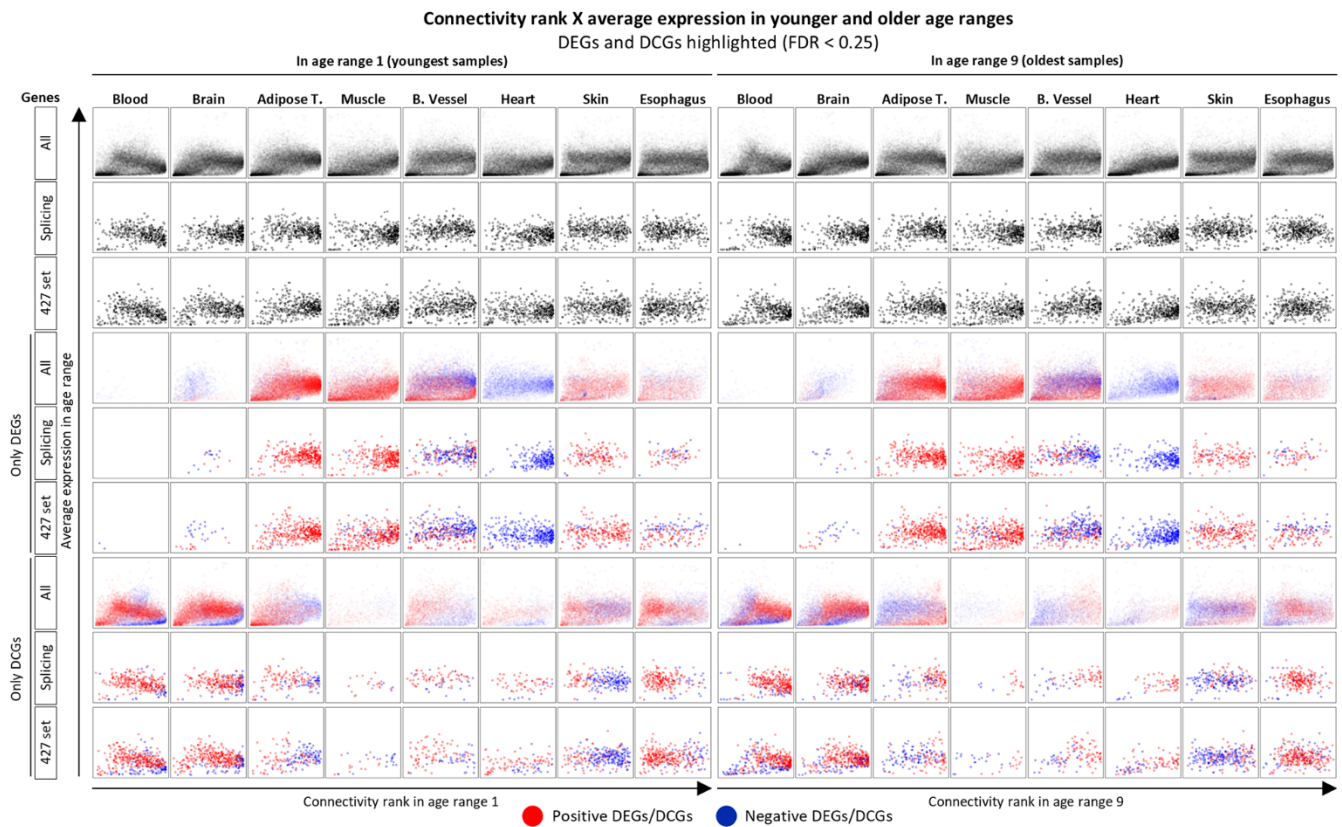

**Supplementary Figure 9. Connectivity ranks x average expression of different sets of genes in age ranges 1 or 9, with DEGs and DCGs highlighted.** DEGs and DCGs highlighted considered FDR < 0.25, to emphasize the overall patterns of the trajectories. Results with FDR < 0.1 can be found in Supplementary Figure 6.

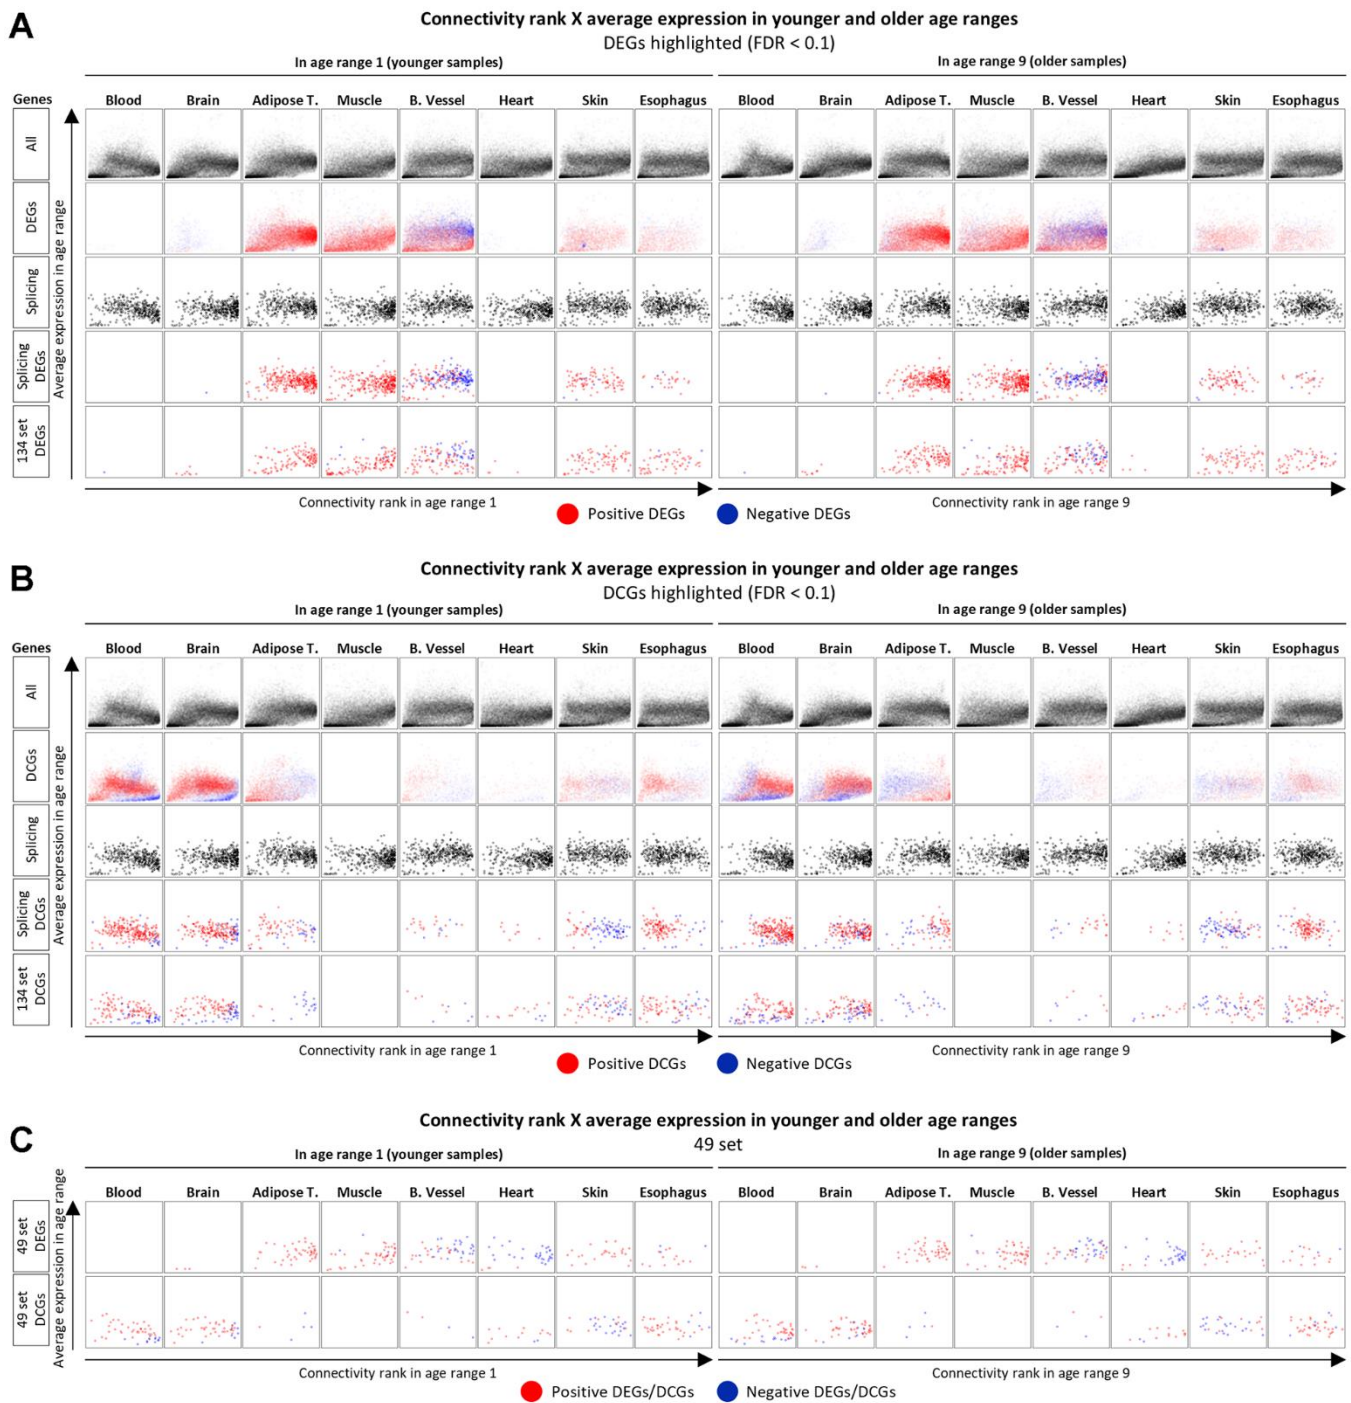

**Supplementary Figure 10. Distribution of positive and negative slopes among DEGs and DCGs.** (A) Connectivity ranks x average expression of different sets of genes in age ranges 1 or 9, with DEGs highlighted with FDR < 0.1. (B) Connectivity ranks x average expression of different sets of genes in age ranges 1 or 9, with DCGs highlighted with FDR < 0.1. (C) Connectivity ranks x average expression of the 49-set genes in age range 1 or 9, with DEGs and DCGs highlighted with FDR < 0.1 for all tissues except heart, with an FDR < 0.25. (C) only displays the charts for the 49-set as the charts for other tissues with FDR < 0.1 or FDR < 0.25 are shown in Figures S5, S5A and S5B.

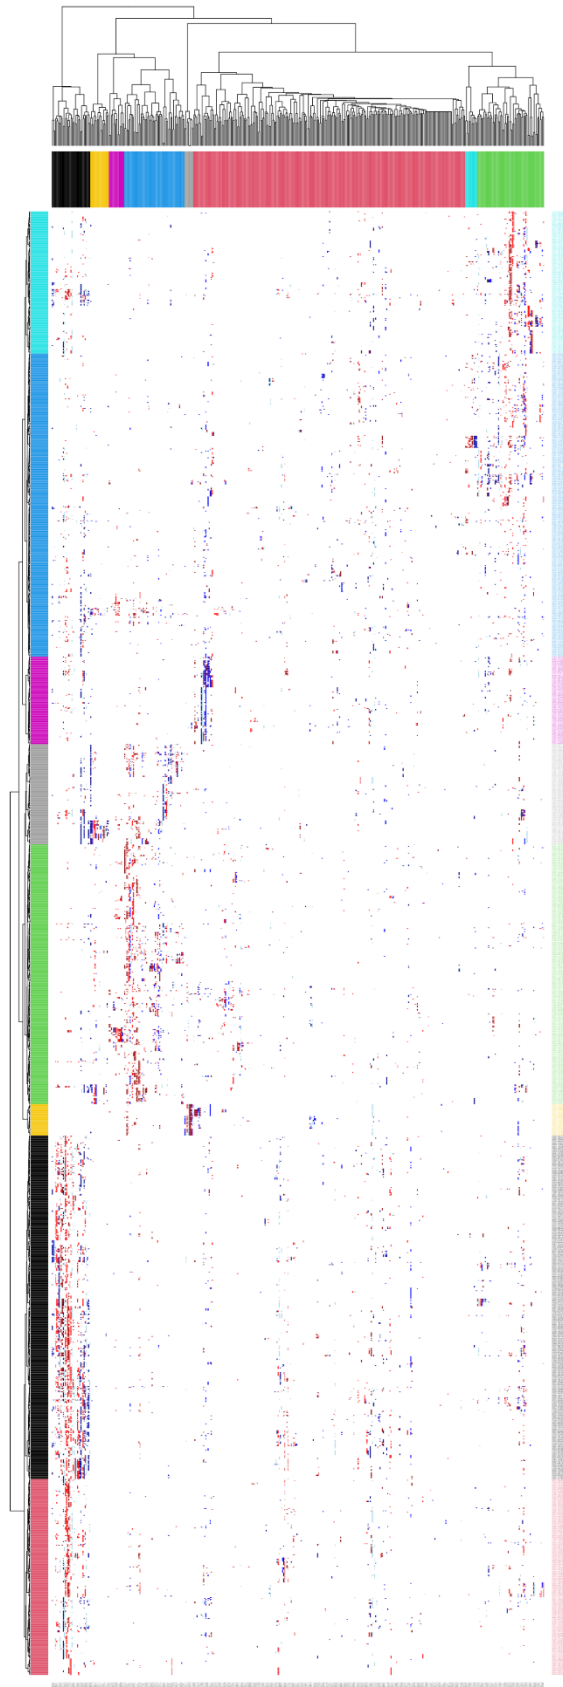

**Supplementary Figure 11. Consensus Modules Enrichment Heatmap.** Larger version of the heatmap in Figure 5A, displaying all labels.

# A STRING protein-protein interaction networks

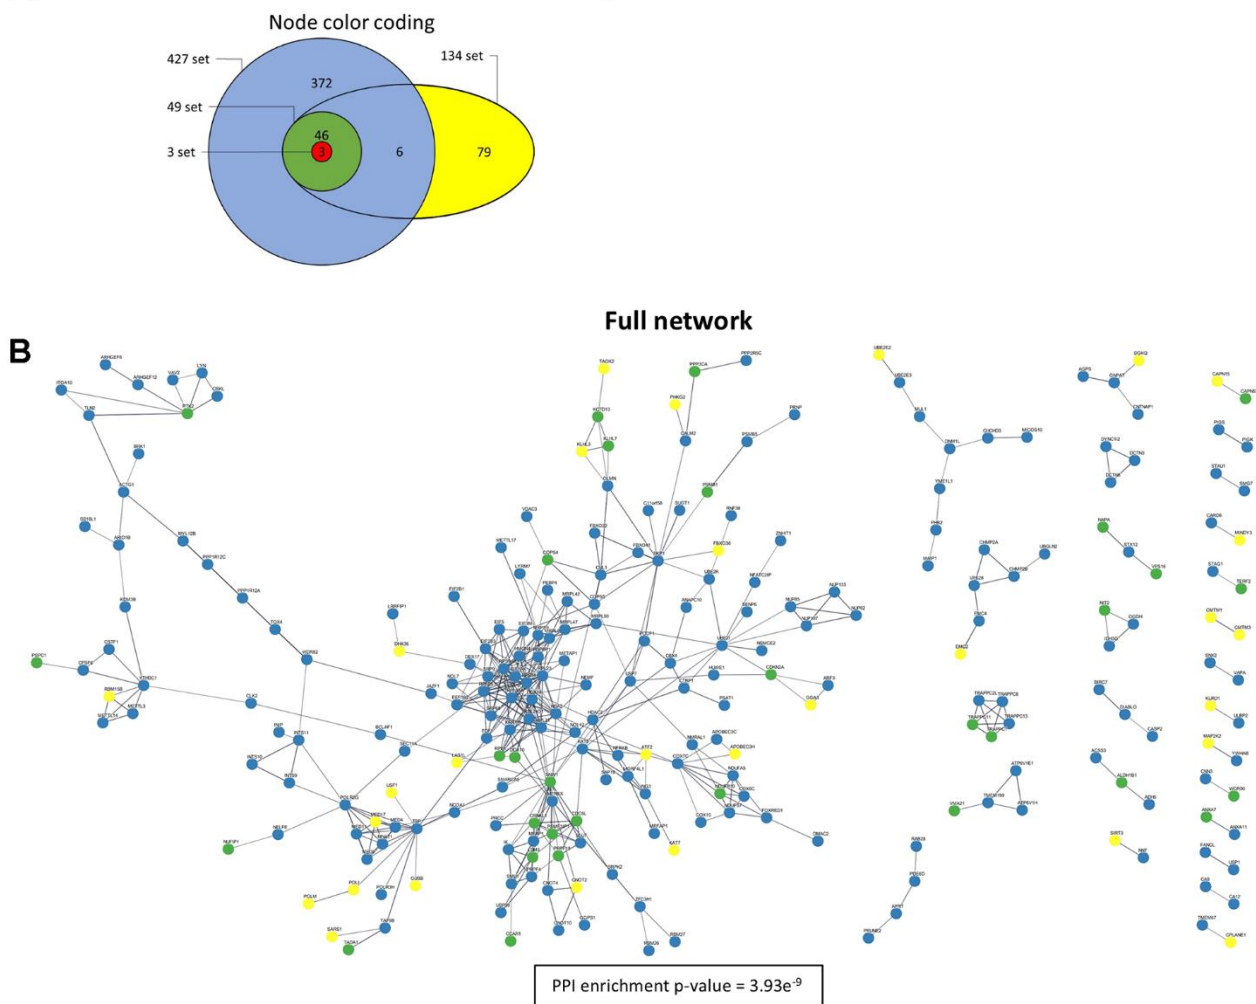

**Supplementary Figure 12. STRING PPI full network.** (A) Color coding for the nodes in the network indicating to which intersection set the corresponding genes belong. (B) Full interaction network, including only links with a confidence score of at least 0.7 in STRING; singletons (unconnected nodes) are omitted. The larger cluster in the middle represents ribosomal proteins, and the cluster below it, RNA splicing genes.
